## Editorial Views

Anesthesiology  
52:461-465, 1980

## Cerebral Metabolic Rate in Hypercarbia—A Controversy

IN THIS ISSUE of the Journal, Artru and Michenfelder<sup>1</sup> report results of experiments designed to study the influence of hypercarbia on metabolic rate and blood flow in the brain. The background of this work can be summarized as follows. Since Kety and Schmidt<sup>2</sup> devised the inert gas technique for measuring cerebral blood flow (CBF) and cerebral metabolic rate for oxygen (CMR<sub>O<sub>2</sub></sub>), several groups have studied how hypercarbia affects these variables, using the original nitrous oxide technique, modifications thereof, or techniques that have been validated against it. Until quite recently, it was generally accepted that hypercarbia increases CBF but leaves CMR<sub>O<sub>2</sub></sub> unchanged. Two conflicting studies have now been published. Berntman *et al.*,<sup>3</sup> using rats receiving N<sub>2</sub>O, 70 per cent, and using a modification of the Kety-Schmidt procedure designed to facilitate measurements of very high flow rates, reported that hypercarbia (PaCO<sub>2</sub> about 80 torr) increased CMR<sub>O<sub>2</sub></sub> by about 25 per cent. They further found that if the animals were pretreated with propranolol or given sedative or anesthetic doses of diazepam, CMR<sub>O<sub>2</sub></sub> decreased during hypercarbia. In experiments on phencyclidine-anesthetized baboons, Kliefoth *et al.*,<sup>4</sup> found that hypercarbia (PaCO<sub>2</sub> about 70 torr) decreased CMR<sub>O<sub>2</sub></sub> by 30 per cent. These authors used the <sup>15</sup>O technique described by Ter-Pogossian *et al.*,<sup>5</sup> which does not require measurement of arteriovenous oxygen content difference [C(a-v)<sub>O<sub>2</sub></sub>].

Artru and Michenfelder<sup>1</sup> worked on dogs maintained on N<sub>2</sub>O, 70 per cent, and halothane, <0.1 per cent, and increased the PaCO<sub>2</sub> to either 80 or 100 torr. Cerebral blood flow was estimated both directly, by timed collections from a catheter in the superior sagittal sinus, and indirectly, from the clearance of

<sup>133</sup>Xe injected into the lingual artery. Clearance was measured by an external collimated detector and CBF was calculated both by the half-peak time (T<sub>1/2</sub>) method described by Waltz *et al.*<sup>6</sup> and by the initial slope technique.<sup>7</sup> The authors found a good correspondence between CBF values obtained with the direct and indirect techniques provided "indirect CBF" was derived with the T<sub>1/2</sub> method. Derivation of CMR<sub>O<sub>2</sub></sub> from CBF and C(a-v)<sub>O<sub>2</sub></sub> showed no change at PaCO<sub>2</sub> 80 torr but a 10 per cent decrease at PaCO<sub>2</sub> 100 torr. The authors conclude that their values agree with those showing no change in CMR<sub>O<sub>2</sub></sub> during hypercarbia, or a decrease.<sup>4</sup> In support of this conclusion they quote results of Des Rosiers *et al.*,<sup>8</sup> who reported that hypercarbia decreases CMR<sub>O<sub>2</sub></sub> and glucose utilization (CMR<sub>gl</sub>) equally in rats, and Kogure *et al.*,<sup>9</sup> who found that hypercarbia in the same species decreased high-energy phosphate (~P) utilization in the brain following decapitation by about 15 per cent. Accordingly, Artru and Michenfelder<sup>1</sup> conclude that the only major discrepancy is with the study of Berntman *et al.*<sup>3</sup> They consider the possibility that the results obtained by Berntman *et al.* reflect either the difficulty of accurately deriving CMR<sub>O<sub>2</sub></sub> at the excessively high flow rates encountered in hypercarbic rats or a peculiar response to hypercarbia in that species.

It is the purpose of this editorial to put the question under debate, *i.e.*, the effect of hypercarbia on cerebral metabolic rate, into a somewhat broader perspective, and to attempt a critical evaluation of results presented in the medical literature.

## Hypercarbia and Brain Function

Hypercarbia profoundly affects integrated brain function and various neurophysiologic events.<sup>10-13</sup> Many of these effects mimic those elicited by depressant drugs. For example, moderate hypercarbia

Accepted for publication January 2, 1980.  
Address reprint requests to Dr. Siesjö.

increases the threshold for electrically or chemically induced seizures, and more severe hypercarbia induces anesthesia. In the rat, anesthesia is observed when inspired  $\text{CO}_2$  concentrations exceed about 40 per cent ( $\text{Pa}_{\text{O}_2} \approx 300$  torr).<sup>10</sup> In the dog,  $\text{CO}_2$  has no narcotic effect until  $\text{Pa}_{\text{CO}_2}$  values of about 250 torr are reached.<sup>14</sup>

Probably, many of the effects discussed reflect neurophysiologic inhibition at the cerebral cortical level, with hyperpolarization of neurons. However, it must be emphasized that evidence of excitation also exists. Outside the central nervous system signs of sympathoadrenal activation are often conspicuous,<sup>15</sup> and hypercarbia is known to release catecholamines from the adrenals.<sup>16</sup> In the brain, the rates of synthesis of catecholamines and of serotonin are increased during hypercarbia.<sup>17</sup> One interpretation of these results is that hypercarbia enhances activity in noradrenergic and in 5-hydroxytryptamine (5-HT) neurons, and depresses dopaminergic impulse traffic.<sup>18</sup> Moderate hypercarbia stimulates the brainstem reticular activating system, and the overall functional effect may be cortical arousal, with a high-frequency, low-amplitude EEG pattern. Furthermore, rats exposed to  $\text{CO}_2$ , 30 per cent, are subject to spontaneous seizures.<sup>10</sup>

Clearly, hypercarbia induces a complex pattern of inhibition and excitation. It is conceivable, if not likely, that the balance between inhibition and excitation is influenced by experimental conditions, *e.g.*, by the anesthetic used. In view of the results discussed, it appears difficult to predict the cerebral metabolic effects of hypercarbia, except when it is of sufficient severity to induce stupor or unconsciousness. Even then, predictions will be nothing more than guesses, since the relevant medical literature gives evidence of anesthetic drugs that induce unconsciousness without lowering cerebral metabolic rate. To my knowledge, though, this literature gives no evidence that metabolic rate can be appreciably lowered in the absence of gross signs of reduced consciousness. It is, therefore, somewhat difficult to accept without reservation the results of Kliefoth *et al.*<sup>4</sup>

### Hypercarbia and Cerebral Metabolic State

Kliefoth *et al.*<sup>4</sup> discuss the 30 per cent decrease in  $\text{CMR}_{\text{O}_2}$  during hypercarbia as reflecting a "toxic" effect of  $\text{CO}_2$  on cerebral metabolism. Such a conclusion receives no support from studies demonstrating unchanged tissue concentrations of ATP, ADP and AMP in animals exposed to  $\text{CO}_2$  concentrations as high as 40–50 per cent.<sup>10–22</sup>

Although hypercarbia does not perturb the energy balance in the brain, it profoundly affects tissue concentrations of glycolytic metabolites, citric acid cycle intermediates, and some associated amino acids.<sup>20–23</sup> In summary, these changes involve accumulation of glucose, glucose-6-phosphate, and fructose-6-phosphate, and decreases in the concentrations of fructose-1,6-diphosphate and "downstream" glycolytic metabolites, as well as most citric acid intermediates. Changes in amino acids are dominated by an increased aspartate/glutamate ratio, but experiments with very high  $\text{CO}_2$  concentrations reveal an increase in ammonia concentration as well, and a decrease in the size of the pool of free amino acids. In many respects, this pattern of changes resembles that observed in insulin-induced hypoglycemia.

### Cerebral Glucose Utilization in Hypercarbia

In order to appreciate the meaning of the perturbation in concentrations of carbohydrate intermediates and amino acids in hypercarbia, we must consider glucose utilization ( $\text{CMR}_{\text{gl}}$ ). In the nonketonic man or experimental animal overall metabolism in the brain is approximated by the equation

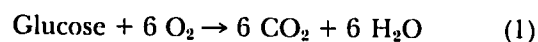

The equation expresses the fact that the oxidation of 1 mole of glucose requires 6 moles of  $\text{O}_2$ . Normally, glucose consumption is in slight excess of oxygen utilization, mainly because there is some "spillover" of lactate from tissue to blood. In order to quantitate this fraction, Cohen *et al.*<sup>24</sup> derived the oxygen/glucose index (OGI)

$$\text{OGI} = \frac{\text{C(a-v)}\text{O}_2}{6 \cdot \text{C(a-v)}_{\text{gl}}} \cdot 100 \quad (2)$$

Obviously, when the OGI is close to 100 per cent we can assume that all glucose extracted is oxidized to  $\text{CO}_2$  and water, and the rate of cerebral "energy flux" can be estimated by measuring either  $\text{CMR}_{\text{O}_2}$  or  $\text{CMR}_{\text{gl}}$ .

In their studies of metabolic and circulatory effects of halothane anesthesia in man, Cohen *et al.*<sup>24</sup> found that the OGI varied directly with  $\text{Pa}_{\text{CO}_2}$ . Thus, their results obtained in studies of hypercarbia suggested that oxygen consumption was greater than could be accounted for in terms of glucose extraction. The explanation for this finding came when two groups independently deduced that hypercarbia inhibits glycolysis at the phosphofructokinase step, necessitating mobilization of substrate ("carbon skeletons") from endogenous carbohydrate and amino acid stores. The conclusion was corroborated by direct measurements of

CMR<sub>gl</sub> with a kinetic <sup>14</sup>C-glucose technique.<sup>25,26</sup> The results showed that hypercarbia is accompanied by a decrease in CMR<sub>gl</sub>, which, at least during the first few minutes, may decrease to a third of control. A corresponding decrease in CMR<sub>O<sub>2</sub></sub> was not observed, and the mismatch between CMR<sub>gl</sub> and CMR<sub>O<sub>2</sub></sub> is illustrated by the results reported by Miller *et al.*,<sup>25</sup> who found an increase in the OGI from 0.9 to 1.9 in rats exposed to CO<sub>2</sub>, 20 per cent, for 5 min. It is, therefore, difficult to explain the results of Des Rosiers *et al.*,<sup>8</sup> who found stoichiometrically similar decreases in CMR<sub>gl</sub> and CMR<sub>O<sub>2</sub></sub> in rats during hypercarbia.

### CBF-CMR<sub>O<sub>2</sub></sub> in Hypercarbia: Effect of Drugs

Artru and Michenfelder<sup>1</sup> remark that if the results of Berntman *et al.*<sup>3</sup> are to be accepted as reported, there must be major species differences between the rat and other animals. Clearly, species differences do exist, and a mere inspection of CBF values obtained in monkeys, dogs, and rats emphasizes the point. However, it is probably a mistake not to consider also the large variations obtained in the same species under different experimental conditions. In order to illustrate this variation, we can compare absolute CBF values recently measured at Pa<sub>CO<sub>2</sub></sub> values of 70–80 torr in ventilated rats under the following conditions: 1) N<sub>2</sub>O, 70 per cent, infusion of isoproterenol, iv, at a dose of 2 µg/kg/min; 2) N<sub>2</sub>O, 70 per cent, "control"; 3) N<sub>2</sub>O, 70 per cent, with prior injection of propranolol, 2.5 mg/kg, iv; 4) diazepam, 2.25 mg/kg, iv; 5) N<sub>2</sub>O, 70 per cent, with prior injection of indomethacin, 10 mg/kg, iv.<sup>3,27,28</sup> In none of the groups 1, 3, 4 and 5 did CMR<sub>O<sub>2</sub></sub> deviate from "control" (group 2) before hypercarbia was induced. During hypercarbia, the mean CBF values, measured with the modified Kety-Schmidt technique, were 8.1, 6.8, 3.9, 2.0, and 1.3 ml/g/min, respectively.

The dramatic changes induced in the circulatory response to hypercarbia by drugs that probably mainly influence either catecholamine or prostaglandin metabolism raise the question whether anesthetic drugs also modulate the metabolic response to hypercarbia. As already mentioned, the results of Berntman *et al.*<sup>3</sup> demonstrate that this is so. To take one example, if the experiments had been performed only on animals given diazepam as an "anesthetic," the inescapable conclusion would have been that hypercarbia decreases CMR<sub>O<sub>2</sub></sub>. At present, we do not know why diazepam or propranolol transforms an increase in CMR<sub>O<sub>2</sub></sub> during hypercarbia into a decrease, neither do we know why diazepam and propranolol decrease both CBF and CMR<sub>O<sub>2</sub></sub><sup>3</sup> while indomethacin dramati-

cally reduces CBF without affecting CMR<sub>O<sub>2</sub></sub>.<sup>27</sup> Whatever the underlying mechanisms are, it seems unwarranted to omit a discussion of anesthetic conditions when results obtained in hypercarbia are debated.

### Cerebral Metabolic Rate in Hypercarbia

Artru and Michenfelder<sup>1</sup> give a clear account of the discrepant results of studies of cerebral metabolic rates in hypercarbia, but they do not discuss all relevant data. The following is an attempt to review the major studies published.

I agree with Artru and Michenfelder<sup>1</sup> and with Kliefoth *et al.*<sup>4</sup> that results in *man* are inconclusive, mostly because the hypercarbia was so moderate that any change from the normal may have escaped detection. The results obtained by Alberti *et al.*,<sup>29</sup> who increased Pa<sub>CO<sub>2</sub></sub> to 65 torr and measured CBF with the Kety-Schmidt technique in the *dog*, agree with those of Artru and Michenfelder (Pa<sub>CO<sub>2</sub></sub> 80 torr), *i.e.*, they show no change in CMR<sub>O<sub>2</sub></sub>. It should be mentioned, though, that the dogs studied by Alberti *et al.*<sup>29</sup> were given pentobarbital and maintained on halothane, 1 per cent.

Artru and Michenfelder accept the 30 per cent decrease in CMR<sub>O<sub>2</sub></sub> obtained by Kliefoth *et al.*<sup>4</sup> in phencyclidine-anesthetized *monkeys*, but they do not mention the results of Pickard and MacKenzie,<sup>30</sup> who estimated CBF in phencyclidine-N<sub>2</sub>O-anesthetized baboons from <sup>133</sup>Xe clearance (height over area analyses) and calculated CMR<sub>O<sub>2</sub></sub> from CBF and C(a-v)<sub>O<sub>2</sub></sub> (superior sagittal sinus). These authors remarked that hypercarbia produced an increase in CMR<sub>O<sub>2</sub></sub> of 15 per cent, but that the change was not significant. There is clearly a large difference in results (+15 versus -29 per cent) obtained in primates.

Results obtained in *rats* are controversial. In our previous studies, which showed no change in CMR<sub>O<sub>2</sub></sub> during hypercarbia, the CBF technique was probably not sensitive enough to detect a moderate change in CMR<sub>O<sub>2</sub></sub> (see Berntman *et al.*<sup>3</sup>). Artru and Michenfelder<sup>1</sup> quote the results of Kogure *et al.*<sup>9</sup> and Des Rosiers *et al.*,<sup>8</sup> which suggest a decrease in cerebral energy flux during hypercarbia. They do not mention two other studies that give different results. In one (Miller *et al.*<sup>22</sup>), the authors deduced CBF from CMR<sub>gl</sub> and C(a-v)<sub>gl</sub>, and CMR<sub>O<sub>2</sub></sub> from CBF and C(a-v)<sub>O<sub>2</sub></sub>, and concluded that hypercarbia *increases* CMR<sub>O<sub>2</sub></sub> (normocarbic and hypercarbic values were 3.5 and 4.7 µmol/g/min, respectively). Admittedly, this is a rather indirect way of estimating CMR<sub>O<sub>2</sub></sub>. However, Hemmingsen *et al.*<sup>31</sup> calculated CBF from the initial slope of <sup>133</sup>Xe clearance and CMR<sub>O<sub>2</sub></sub> from CBF and C(a-v)<sub>O<sub>2</sub></sub>. The results showed that hypercarbia significantly in-

creased  $CMR_{O_2}$ , i.e., they confirmed those reported by Berntman *et al.*<sup>3</sup> There are, thus, three studies in the rat suggesting that  $CMR_{O_2}$  increases during hypercarbia, and two showing the opposite. Of the latter, one (Des Rosiers *et al.*<sup>8</sup>) has been reported in abstract form only. The results of the other (Kogure *et al.*<sup>9</sup>) are based on a technique for assessing cerebral metabolic rate whose general validity is not known. Lowry's "closed-system" technique is based on the assumption that, following decapitation and the rapid consumption of oxygen dissolved in the tissue (or bound in blood available for  $O_2$  transport), the preischemic metabolic flux is reflected in the expenditure of existing high-energy phosphate compounds, and of ATP formed anaerobically. One of the problems with the technique is that with ischemic periods as short as 10 sec the oxygen content of the tissue is not negligible.<sup>32</sup> In hypercarbia, this content is appreciably increased and a decrease in  $\sim P$  utilization could reflect merely a delay in the exhaustion of available oxygen stores.

### Why These Discrepant Results?

Quite naturally, anyone confronted with these divergent reports must inquire into the reasons. Possibly some of the major differences in results are due to the anesthetics used, and one cannot exclude species differences. However, it seems necessary to scrutinize the CBF/ $CMR_{O_2}$  techniques used. The ideal technique for measuring CBF has not yet been devised. Since the inert-gas technique of Kety and Schmidt<sup>2</sup> is based on the law of conservation of matter, and since it involves few simplifying assumptions, it has remained the method of reference. However, the method gives correct values only if one can exclude the presence of very slowly perfused tissue masses, of extracerebral contamination, and of arteriovenous shunts. The first two of these potential errors are most likely to present problems at low flow rates, and a bias may be introduced when the method is used for comparisons of  $CMR_{O_2}$  values obtained at high and low flow rates.

Calculations of CBF from the clearance rates of intraarterially injected radioactive tracers conform to the law of conservation of matter only when stochastic (height over area) analyses are performed.<sup>33,34</sup> Derivation of CBF by the initial slope or  $T_{1/2}$  procedures is practically useful, but the quantitative significance of values obtained is doubtful, and when they are used to calculate  $CMR_{O_2}$  one must introduce the further assumption that the CBF values derived reflect flow in areas delivering blood to the site of sampling of venous blood.

The direct CBF technique used by Artru and Michenfelder<sup>1</sup> has previously been validated against

the Kety and Schmidt technique.<sup>35</sup> The validity of the technique rests on the assumption that venous outflow occurs from a constant mass of tissue. To test this assumption for a hypercarbic situation, the authors compared the direct CBF values with those calculated from  $^{133}Xe$  clearance, using either the  $T_{1/2}$  or the initial slope procedure. With the former, agreement was excellent in normo- and hypercarbia. With the latter, agreement was good in hypercarbia but not in normocarbia. If one accepts the  $T_{1/2}$  values (and the direct CBF), the results show that hypercarbia ( $Pa_{CO_2}$  80 torr) does not change  $CMR_{O_2}$ . However, if the initial slope values were correct, the results would have shown an increase in  $CMR_{O_2}$  during hypercarbia. Unfortunately, there is no information available to suggest whether the  $T_{1/2}$  or the initial slope values truly reflect changes in flow rates in structures draining their blood into the sinus.

### Concluding Remarks

Since hypercarbia is a common pathophysiologic condition, its effects on cerebral metabolism and blood flow are of obvious concern to many scientists and clinicians, anesthesiologists included. It is disconcerting that 30 years after the first quantitative report,<sup>36</sup> we still do not know how hypercarbia affects cerebral metabolic rate. The meticulous study of Artru and Michenfelder<sup>1</sup> adds valuable information. In my opinion, though, it does not resolve the existing controversy. The study of Berntman *et al.*<sup>3</sup> suggests that, in the rat,  $CMR_{O_2}$  is increased at  $Pa_{CO_2}$  80 torr, normal at 160 torr, and decreased at 240 torr. Artru and Michenfelder<sup>1</sup> report that, in the dog,  $CMR_{O_2}$  is unchanged at  $Pa_{CO_2}$  80 torr, and decreased at 100 torr. If we confine ourselves to "moderate" hypercarbia ( $Pa_{CO_2}$  60–80 torr), their results are in line with those of many others, but they seem contrary to those obtained in several studies in the rat suggesting an increase in  $CMR_{O_2}$  and other studies indicating that  $CMR_{O_2}$  is decreased. Perhaps future work will shed light on the discrepancies.

Bo K. SIESJÖ, M.D.  
M.R.C. Professor of Brain Metabolism  
Laboratory of Experimental Brain Research  
E-Blocket  
University of Lund  
Lund, Sweden

### References

1. Artru AA, Michenfelder JD: Effects of hypercarbia on canine cerebral metabolism and blood flow with simultaneous direct and indirect measurement of blood flow. *ANESTHESIOLOGY* 52:466–469, 1980

2. Kety SS, Schmidt CF: The nitrous oxide method for the quantitative determination of cerebral blood flow in man: Theory, procedure and normal values. *J Clin Invest* 27: 476-483, 1948
3. Berntman L, Dahlgren N, Siesjö BK: Cerebral blood flow and oxygen consumption in the rat brain during extreme hypercapnia. *ANESTHESIOLOGY* 50:299-305, 1979
4. Kliefoth AB, Grubb RL Jr, Raichle ME: Depression of cerebral oxygen utilization by hypercapnia in the rhesus monkey. *J Neurochem* 32:661-663, 1979
5. Ter-Pogossian MM, Eichling JO, Davis DO, et al: The measure *in vivo* of regional cerebral oxygen utilization by means of oxyhemoglobin labeled with radioactive oxygen-15. *J Clin Invest* 49:381-391, 1970
6. Waltz AG, Wanek AR, Anderson RE: Comparison of analytic methods for calculation of cerebral blood flow after intra-carotid injection of  $^{133}\text{Xe}$ . *J Nucl Med* 13:66-72, 1972
7. Olesen J, Paulson OB, Lassen NA: Regional cerebral blood flow in man determined by the initial slope of the clearance of intra-arterially injected  $^{133}\text{Xe}$ . *Stroke* 2:519-540, 1971
8. Des Rosiers MH, Kennedy C, Sakurada O, et al: Effects of hypercapnia on cerebral oxygen and glucose consumption in the conscious rat. *Stroke* 9:98, 1978
9. Kogure K, Busto R, Scheinberg P, et al: Dynamics of cerebral metabolism during moderate hypercapnia. *J Neurochem* 24: 471-478, 1975
10. Woodbury DM, Karler R: The role of carbon dioxide in the nervous system. *ANESTHESIOLOGY* 21:686-703, 1960
11. Wyke B: *Brain Function and Metabolic Disorders*. London, Butterworths, 1963
12. Krnjevic K, Randić M, Siesjö BK: Cortical  $\text{CO}_2$  tension and neuronal excitability. *J Physiol (Lond)* 176:105-122, 1965
13. Caspers H, Speckmann E-J: Cerebral  $\text{P}_{\text{O}_2}$ ,  $\text{P}_{\text{CO}_2}$ , and  $\text{pH}$ : Changes during convulsive activity and their significance for spontaneous arrest of seizures. *Epilepsia* 13:699-725, 1972
14. Eisele JH, Eger EI, Muallem M: Narcotic properties of carbon dioxide in the dog. *ANESTHESIOLOGY* 28:856-865, 1967
15. Tenney SM: Sympatho-adrenal activation by carbon dioxide and the inhibitory effect of carbonic acid on epinephrine response. *Am J Physiol* 187:341-346, 1956
16. Nahas GG, Zagury D, Milhaud A, et al: Acidemia and catecholamine output of the isolated canine adrenal gland. *Am J Physiol* 213:1186-1192, 1967
17. Carlsson A, Holmin T, Lindqvist M, et al: Effect of hypercapnia and hypocapnia on tryptophan and tyrosine hydroxylation in rat brain. *Acta Physiol Scand* 99:503-509, 1977
18. De Yabenes Prous JG, Carlsson A, Gomez MAM: The effect of  $\text{CO}_2$  on monoamine metabolism in rat brain. *Naunyn-Schmiedeberg Arch Pharmacol* 301:11-15, 1977
19. Folbergrová J, MacMillan V, Siesjö BK: The effect of moderate and marked hypercapnia upon the energy state and upon the cytoplasmic  $\text{NADH/NAD}^+$  ratio of the rat brain. *J Neurochem* 19:2497-2505, 1972
20. Folbergrová J, Pomén U, Siesjö BK: Patterns of changes in brain carbohydrate metabolites, amino acids and organic phosphates at increased carbon dioxide tensions. *J Neurochem* 22:1115-1125, 1974
21. Folbergrová J, Norberg K, Quistorff B, et al: Carbohydrate and amino acid metabolism in rat cerebral cortex in moderate and extreme hypercapnia. *J Neurochem* 25:457-462, 1975
22. Miller AL, Hawkins RA, Harris RL, et al: The effects of acute and chronic morphine treatment and of morphine withdrawal on rat brain *in vivo*. *Biochem J* 129:463-469, 1972
23. Folbergrová J, MacMillan V, Siesjö BK: The effect of hypercapnic acidosis upon some glycolytic and Krebs cycle-associated intermediates in the rat brain. *J Neurochem* 19:2507-2517, 1972
24. Cohen PJ, Wollman H, Alexander SC, et al: Cerebral carbohydrate metabolism in man during halothane anesthesia. *ANESTHESIOLOGY* 25:185-191, 1964
25. Miller AL, Hawkins RA, Veech RL: Decreased rate of glucose utilization by rat brain *in vivo* after exposures to atmospheres containing high concentrations of  $\text{CO}_2$ . *J Neurochem* 25: 553-558, 1975
26. Borgström L, Norberg K, Siesjö BK: Glucose consumption in rat cerebral cortex in normoxia, hypoxia and hypercapnia. *Acta Physiol Scand* 96:569-574, 1976
27. Sakabe T, Siesjö BK: The effect of indomethacin on the blood flow-metabolism couple in the brain under normal, hypercapnic and hypoxic conditions. *Acta Physiol Scand*, 1979
28. Siesjö BK, Berntman L, Nilsson B: Regulation of microcirculation in the brain. *Microvasc Res* (in press)
29. Alberti E, Hoyer S, Hamer J, et al: The effect of carbon dioxide on cerebral blood flow and cerebral metabolism in dogs. *Br J Anaesth* 47:941-947, 1975
30. Pickard JD, MacKenzie ET: Inhibition of prostaglandin synthesis and the response of baboon cerebral circulation to carbon dioxide. *Nature New Biol* 245:187-188, 1973
31. Hemmingsen R, Hertz MM, Barry DI: The effect of propranolol on cerebral oxygen consumption and blood flow in the rat: Measurements during normocapnia and hypercapnia. *Acta Physiol Scand* 105:274-281, 1979
32. Siesjö BK: *Brain Energy Metabolism*. Chichester, N. Y., John Wiley and Sons, 1978
33. Zierler KL: Equations for measuring blood flow by external monitoring of radioisotopes. *Circ Res* 16:309-321, 1965
34. Lassen NA, Høedt-Rasmussen K: Human cerebral blood flow measured by two inert gas techniques. Comparison of the Kety-Schmidt method and the intra-arterial injection method. *Circ Res* 19:681-688, 1966
35. Michenfelder JD, Messich JM Jr, Theye RA: Simultaneous cerebral blood flow measured by direct and indirect methods. *J Surg Res* 8:475-481, 1968
36. Kety SS, Schmidt CF: The effects of altered arterial tensions of carbon dioxide and oxygen on cerebral blood flow and cerebral oxygen consumption of normal young man. *J Clin Invest* 27:484-491, 1948
